# Supplementary material for: A novel laser-based spectroscopic method reveals the isotopic signatures of nitrous oxide produced by eukaryotic and prokaryotic phototrophs in darkness
Source: Copernicus journal article supplement (doi:10.5194/bg-23-497-2026), 2026-01-20
Supplement: Supplementary file 1 [file bg-23-497-2026-supplement.pdf]

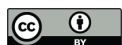

*Supplement of*

**A novel laser-based spectroscopic method reveals the isotopic signatures of nitrous oxide produced by eukaryotic and prokaryotic phototrophs in darkness**

**Maxence Plouviez et al.**

*Correspondence to:* Naomi Wells ([naomi.wells@lincoln.ac.nz](mailto:naomi.wells@lincoln.ac.nz))

The copyright of individual parts of the supplement might differ from the article licence.

## Section S1. Denitrifiers cultures

Denitrifying inocula were cultivated in closed Duran bottles containing simulated domestic wastewater (**Table S1**). These reactors were seeded with a pond sediment suspension (Massey University) and continuously mixed using magnetic agitation at 100 rpm. Once denitrification was confirmed (via nitrate monitoring), the reactors were operated as sequential batch reactors by gradually increasing the feeding rate to reach a hydraulic retention time (HRT) of 10 days. This operation was achieved by i) turning the agitation off and letting biomass to settle for 1 hour before ii) removing 100 ml of culture broth using a syringe (via a sample port) and 3) injecting 100 ml of fresh medium before resuming agitation. The settling period was discontinued once a strong denitrifying ability was evidenced to prevent the excessive accumulation of dead biomass.

**Table S1:** Denitrification medium

| Solution/salt           | Composition (g/L)                                                                                                                                                                                                                                                                                                                | mL added/L |
|-------------------------|----------------------------------------------------------------------------------------------------------------------------------------------------------------------------------------------------------------------------------------------------------------------------------------------------------------------------------|------------|
| <b>Organic solution</b> | Starch (2.1), milk powder (2), dried yeast (0.9), soy oil (0.5)/L, peptone (0.3)                                                                                                                                                                                                                                                 | 100        |
| <b>NO<sub>3</sub></b>   | KNO <sub>3</sub> (14.43)                                                                                                                                                                                                                                                                                                         | 120        |
| <b>Mg</b>               | MgCl <sub>2</sub> ·4H <sub>2</sub> O (4.19)                                                                                                                                                                                                                                                                                      | 100        |
| <b>Phosphate buffer</b> | K <sub>2</sub> HPO <sub>4</sub> (2.178) and KH <sub>2</sub> PO <sub>4</sub> (0.612)                                                                                                                                                                                                                                              | 560        |
| <b>Ca</b>               | CaCl <sub>2</sub> ·2H <sub>2</sub> O (1.33)                                                                                                                                                                                                                                                                                      | 100        |
| <b>Trace element 1</b>  | FeSO <sub>4</sub> 7H <sub>2</sub> O (9) and EDTA (6)                                                                                                                                                                                                                                                                             | 10         |
| <b>Trace element 2</b>  | EDTA (15), ZnSO <sub>4</sub> ·7H <sub>2</sub> O (0.43), CoCl <sub>2</sub> ·6H <sub>2</sub> O (0.24), MnCl <sub>2</sub> ·4H <sub>2</sub> O (0.99), CuSO <sub>4</sub> ·5H <sub>2</sub> O (0.25), NaMoO <sub>4</sub> ·2H <sub>2</sub> O (0.22), NiCl <sub>2</sub> ·6H <sub>2</sub> O (0.19), H <sub>3</sub> BO <sub>3</sub> (0.014) | 10         |

## Section S2. Analytical blind test using isotope analysis to determine fractions of N<sub>2</sub>O from two biological sources in a gas mixture

Aliquots of N<sub>2</sub>O produced by denitrifiers (60 %) and *Chlorella vulgaris* (40 %) were mixed following the incubation experiments described in the manuscript. N<sub>2</sub>O was analysed as described in the manuscript. Using the isotope measurement of N<sub>2</sub>O from the pure cultures, the fractions of each N<sub>2</sub>O source were calculated in a blind experiment, to test for the robustness of the method developed.

The fractions determined using all measured tracers  $\delta^{15}\text{N}\alpha$ ,  $\delta^{15}\text{N}\beta$ ,  $\delta^{15}\text{N}(\text{bulk})$  and especially SP-N<sub>2</sub>O are in good agreement with the fractions used during the preparation (**Figure S1**), except for  $\delta^{18}\text{O}$  (not shown), where the initial values of denitrifiers and *C. vulgaris* are too similar for differentiation with our analysis.

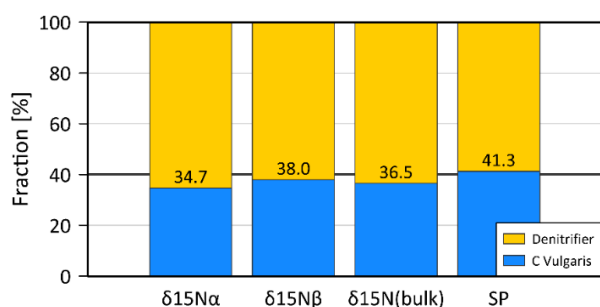

**Figure S1:** Bar plot showing fractions of N<sub>2</sub>O from *Chlorella vulgaris* and denitrifiers synthetic gas mixture prepared during incubation experiments. Fractions are calculated based on isotope ratios measured in pure N<sub>2</sub>O from the respective culture. The thick black line shows the target in this blind test.

### Section S3. N<sub>2</sub>O and isotopomers measurements bias due to N<sub>2</sub>O amount and cell pressure dependence

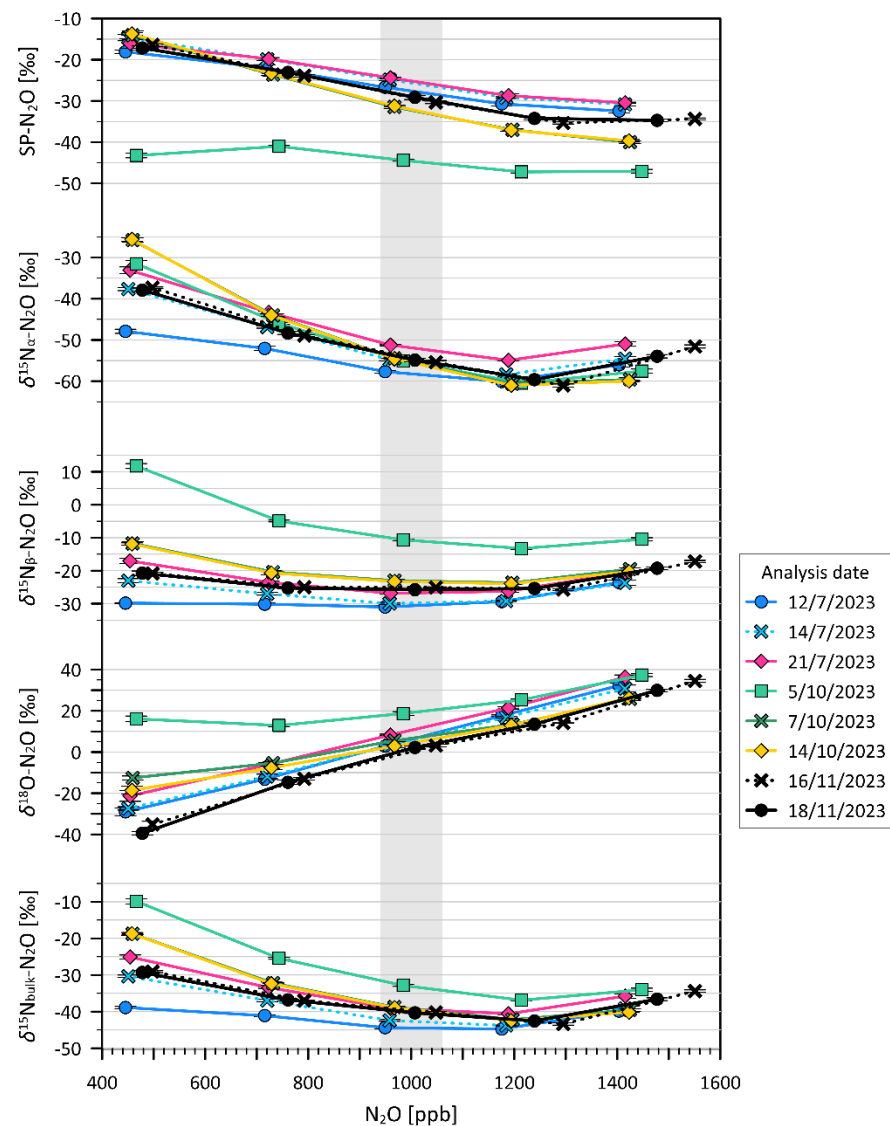

**Figure S2.** Day-to-day variation in isotopomer measurements due to N<sub>2</sub>O amount dependence. This was determined with USGS51-in-air at the start of each measurement sequence. Error bars indicate the standard deviation (1  $\sigma$ ) of the isotope measurements at the respective N<sub>2</sub>O level. The grey bar indicates the typical N<sub>2</sub>O mole fraction range of samples and reference gases.

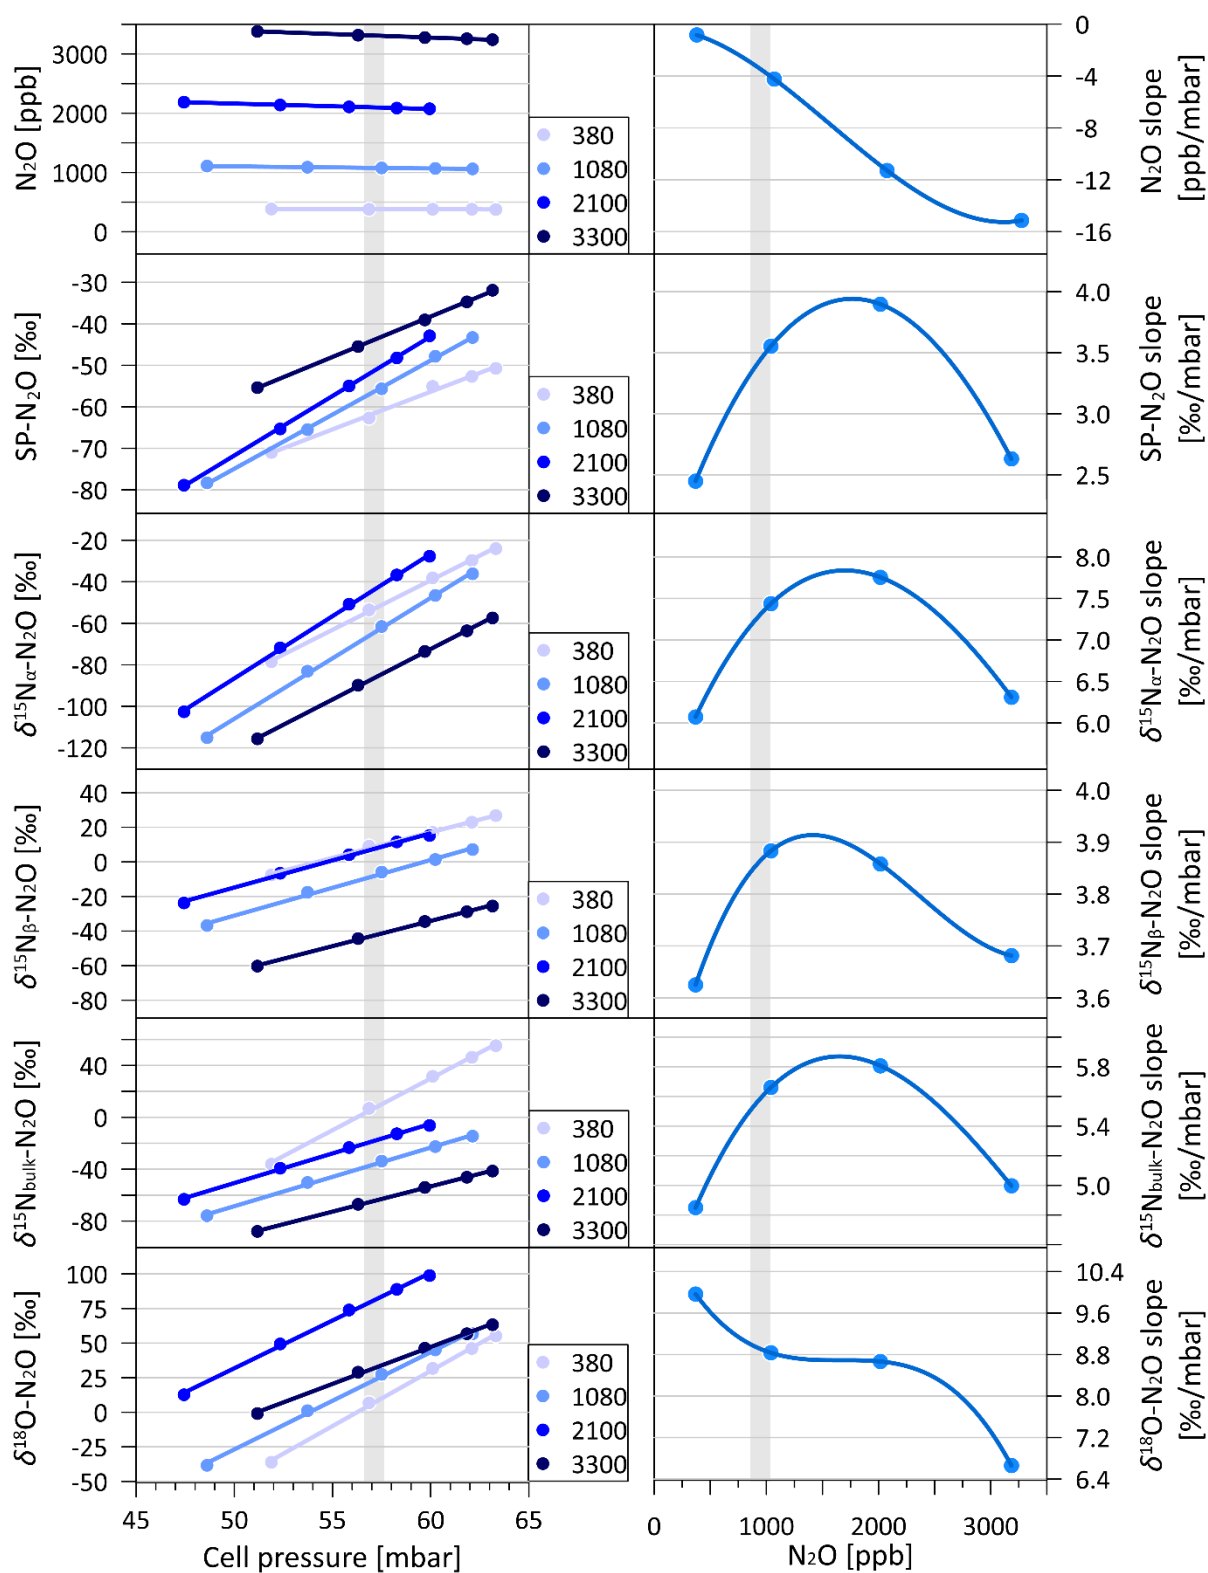

**Figure S3:** Left - Analyser response dependence on cell pressure changes at N<sub>2</sub>O mole fractions of 0.33, 1.08, 2.1 and 3.3 ppm. The response is linear across the typical measurement range (grey box). Right - Polynomial fits of the pressure dependence on N<sub>2</sub>O or isotopomers. The slope of the linear response change varies with N<sub>2</sub>O mole fractions following a 3<sup>rd</sup> order polynomial.

#### Section S4. Measurements sequence followed

| Block #                 | 1     | 2                                        | 3     | 4                                        | 5     | 6                   | 7    | 8                   | 9                   | 10   | 11                  | 12    | 13                  | 14   | 15                  | 16                  | 17   | 18                  | 19    |
|-------------------------|-------|------------------------------------------|-------|------------------------------------------|-------|---------------------|------|---------------------|---------------------|------|---------------------|-------|---------------------|------|---------------------|---------------------|------|---------------------|-------|
| Gas                     | WT    | USGS51-in-air                            | WT    | USGS52-in-air                            | WT    | USGS51-in-air       | S1   | USGS51-in-air       | USGS51-in-air       | S2   | USGS51-in-air       | WT    | USGS51-in-air       | S3   | USGS51-in-air       | USGS51-in-air       | S4   | USGS51-in-air       | WT    |
| N <sub>2</sub> O amount | 1080  | 400-1500                                 | 1080  | 400-1500                                 | 1080  | match S1            | 1000 | match S1            | match S2            | 1000 | match S2            | 1080  | match S3            | 1000 | match S3            | match S4            | 1000 | match S4            | 1080  |
| purpose                 | drift | N <sub>2</sub> O amount<br>SP assignment | drift | N <sub>2</sub> O amount<br>SP assignment | drift | S1 drift correction |      | S1 drift correction | S2 drift correction |      | S2 drift correction | drift | S3 drift correction |      | S3 drift correction | S4 drift correction |      | S4 drift correction | drift |
| n repetitions           | 5     | 5 x 5                                    | 5     | 5 x 5                                    | 5     | 10                  | 10   | 10                  | 10                  | 10   | 10                  | 5     | 10                  | 10   | 10                  | 10                  | 10   | 10                  | 5     |

**Figure S4:** The measurement sequence combines blocks of measurements of air from the working tank (1080), the USGS51-in-air and USGS52-in-air standards used to define the correction for the N<sub>2</sub>O amount effect as well as scaling for a two-point calibration of SP-N<sub>2</sub>O values, up to four samples (S1-S4) and bracketing blocks of USGS51-in-air measurements with N<sub>2</sub>O amounts that match the N<sub>2</sub>O amount in their respective sample.
